# Supplementary material for: Efficacy of Retreatment with Oxaliplatin-Based Regimens in Metastatic Colorectal Cancer Patients: The RETROX-CRC Retrospective Study
Source: MDPI journal article supplement (doi:10.3390/cancers14051197), 2022-02-25
Supplement: s1 [file s1]

**Supplementary Table S1.** Full list of clinico-pathological features, outcome to first oxaliplatin-based regimens and to oxaliplatin retreatment regarding the entire cohort of 119 metastatic colorectal cancer patients retreated with oxaliplatin-based regimens throughout their course of disease.

| Characteristics                                             | Patients (N=119)      |
|-------------------------------------------------------------|-----------------------|
| Median age at diagnosis [median (range)] - yr               | 56.91 [23.98, 79.08]  |
| Age < 50 yr at diagnosis – no. (%)                          | 36 (30.3)             |
| Gender                                                      |                       |
| <i>Male</i>                                                 | 67 (56.3)             |
| <i>Female</i>                                               | 52 (43.7)             |
| Stage at initial diagnosis – no. (%)                        |                       |
| <i>Stage I</i>                                              | 0 (0.0)               |
| <i>Stage II</i>                                             | 12 (10.1)             |
| <i>Stage III</i>                                            | 47 (39.5)             |
| <i>Stage IV</i>                                             | 60 (50.4)             |
| Overall Survival (median [range]) - ms                      | 51.53 [14.77, 175.47] |
| Primary tumor location – no. (%)                            |                       |
| <i>Right sided</i>                                          | 38 (32.0)             |
| <i>Left sided or rectal</i>                                 | 80 (67.2)             |
| <i>Missing</i>                                              | 1 (0.8)               |
| Primary tumor resected – no. (%)                            |                       |
| <i>Yes</i>                                                  | 110 (92.4)            |
| <i>No</i>                                                   | 9 (7.6)               |
| KRAS molecular assessment – no. (%)                         |                       |
| <i>Mutant</i>                                               | 52 (43.7)             |
| <i>Wild-type</i>                                            | 63 (52.9)             |
| <i>Missing</i>                                              | 4 (3.4)               |
| NRAS molecular assessment – no. (%)                         |                       |
| <i>Mutant</i>                                               | 2 (1.7)               |
| <i>Wild-type</i>                                            | 61 (51.3)             |
| <i>Missing</i>                                              | 56 (47.0)             |
| BRAF molecular assessment – no. (%)                         |                       |
| <i>V600E mutant</i>                                         | 13 (10.9)             |
| <i>Wild-type</i>                                            | 82 (68.9)             |
| <i>Missing</i>                                              | 24 (20.2)             |
| MMR molecular assessment – no. (%)                          |                       |
| <i>Microsatellite unstable</i>                              | 2 (1.7)               |
| <i>Microsatellite stable</i>                                | 50 (42.0)             |
| <i>Missing</i>                                              | 67 (56.3)             |
| ERBB2 molecular assessment – no. (%)                        |                       |
| <i>Amplified</i>                                            | 11 (9.2)              |
| <i>Not amplified</i>                                        | 59 (49.6)             |
| <i>Missing</i>                                              | 49 (41.2)             |
| First oxaliplatin based regimen – no. (%)                   |                       |
| <i>FOLFOX</i>                                               | 66 (55.5)             |
| <i>XELOX</i>                                                | 16 (13.4)             |
| <i>FOLFOX + bevacizumab</i>                                 | 23 (19.4)             |
| <i>XELOX + bevacizumab</i>                                  | 2 (1.7)               |
| <i>FOLFOX + cetuximab</i>                                   | 2 (1.7)               |
| <i>FOLFOX + panitumumab</i>                                 | 3 (2.5)               |
| <i>XELOX + panitumumab</i>                                  | 1 (0.8)               |
| <i>FOLFOXIRI</i>                                            | 1 (0.8)               |
| <i>FOLFOXIRI + bevacizumab</i>                              | 4 (3.4)               |
| <i>FOLFOXIRI + cetuximab</i>                                | 1 (0.8)               |
| Setting of first oxaliplatin administration – no. (%)       |                       |
| <i>Adjuvant</i>                                             | 60 (50.4)             |
| <i>Metastatic</i>                                           | 59 (49.6)             |
| Best response to first oxaliplatin administration – no. (%) |                       |
| <i>Complete response</i>                                    | 4 (3.4)               |
| <i>Partial response</i>                                     | 32 (26.9)             |
| <i>Stable disease</i>                                       | 16 (13.4)             |

|                                                                                                                              |                     |
|------------------------------------------------------------------------------------------------------------------------------|---------------------|
| <i>Progressive disease</i>                                                                                                   | 1 (0.8)             |
| <i>Not assessable *</i>                                                                                                      | 66 (55.5)           |
| Patients progressing while receiving first oxaliplatin-based regimen – no. (%)                                               |                     |
| Yes                                                                                                                          | 11 (9.2)            |
| No                                                                                                                           | 108 (90.8)          |
| Median time-to-progression (mTTP) after first oxaliplatin-based regimen according to setting of administration – mo. (range) |                     |
| <i>Adjuvant oxaliplatin (N=59**)</i>                                                                                         | 15.3 (4.1-66.2)     |
| <i>Metastatic oxaliplatin (N=59)</i>                                                                                         | 15.2 (2.1-34.4)     |
| Treatments administered to patients among the two oxaliplatin-based regimens*** - no. (%)                                    |                     |
| 0 - 1                                                                                                                        | 56 (47.1)           |
| > 2                                                                                                                          | 63 (52.9)           |
| Patients who received regorafenib or trifluridine-tipiracile (TAS-102) before oxaliplatin retreatment – no. (%)              |                     |
| None                                                                                                                         | 104 (87.4)          |
| Regorafenib                                                                                                                  | 8 (6.7)             |
| Trifluridine-tipiracile                                                                                                      | 1 (0.8)             |
| Both                                                                                                                         | 6 (5.1)             |
| Surgical resection for metastatic disease following first oxaliplatin administration – no. (%)                               |                     |
| Yes                                                                                                                          | 28 (23.5)           |
| No                                                                                                                           | 91 (76.5)           |
| Line of oxaliplatin retreatment – no. (%)                                                                                    |                     |
| 1 - 2                                                                                                                        | 56 (47.1)           |
| ≥ 3                                                                                                                          | 63 (52.9)           |
| Second oxaliplatin based regimen – no. (%)                                                                                   |                     |
| FOLFOX                                                                                                                       | 74 (62.2)           |
| FOLFOX + BEVACIZUMAB                                                                                                         | 24 (20.2)           |
| FOLFOX + CETUXIMAB                                                                                                           | 1 (0.8)             |
| FOLFOX + PANITUMUMAB                                                                                                         | 5 (4.2)             |
| FOLFOXIRI + BEVACIZUMAB                                                                                                      | 2 (1.7)             |
| XELOX                                                                                                                        | 11 (9.2)            |
| XELOX + BEVACIZUMAB                                                                                                          | 2 (1.7)             |
| PFS <sub>2</sub> (median [range])                                                                                            | 4.40 [0.50, 120.63] |
| Oxaliplatin retreatment response rate (RR) – no. (%)                                                                         |                     |
| Yes                                                                                                                          | 22 (18.5)           |
| No                                                                                                                           | 80 (67.2)           |
| Not assessable                                                                                                               | 17 (14.3)           |
| Surgery after oxaliplatin retreatment – no. (%)                                                                              |                     |
| Yes                                                                                                                          | 9 (7.6)             |
| No                                                                                                                           | 110 (92.4)          |
| Best response to first oxaliplatin administration – no. (%)                                                                  |                     |
| Complete response                                                                                                            | 1 (0.8)             |
| Progressive disease                                                                                                          | 43 (36.1)           |
| Partial response                                                                                                             | 21 (17.7)           |
| Stable disease                                                                                                               | 37 (31.1)           |
| Not assessable                                                                                                               | 17 (14.3)           |

**Keys:** \*=patients with missing data or who received first oxaliplatin-based regimen in the adjuvant setting; \*\*=in one patient time-to-progression was not available; \*\*\*=treatments encompass all treatment approaches (medical, surgical or local such as radiotherapy and others). **Legend:** yr=years; ms=months; no.=absolute number; PFS<sub>2</sub>=progression-free survival with oxaliplatin retreatment.

**Supplementary Table S2.** Logistic regression analysis of response rate (RR) to oxaliplatin retreatment.

| Characteristic                                    | Variables            | PD+SD<br>(N,%)      | PR+CR<br>(N,%)      | Significance<br>(p) |
|---------------------------------------------------|----------------------|---------------------|---------------------|---------------------|
| Oxaliplatin retreatment response rate             |                      | 80 (78.4)           | 22 (21.7)           | -                   |
| Primary tumour location                           | Right colon          | 24 (30.0)           | 7 (31.8)            | 1.000               |
|                                                   | Left colon or rectal | 56 (70.0)           | 15 (68.2)           |                     |
| Stage at diagnosis                                | Stage II             | 7 (8.8)             | 4 (18.2)            | 0.385               |
|                                                   | Stage III            | 31 (38.8)           | 9 (40.9)            |                     |
|                                                   | Stage IV             | 42 (52.5)           | 9 (40.9)            |                     |
| Age at initial diagnosis                          | Median (IQR)         | 56.9 (46.5 to 63.3) | 59.7 (53.4 to 63.6) | 0.345               |
| Gender                                            | Male                 | 44 (55.0)           | 14 (63.6)           | 0.630               |
|                                                   | Female               | 36 (45.0)           | 8 (36.4)            |                     |
| KRAS status                                       | Wild-type            | 40 (51.9)           | 15 (68.2)           | 0.268               |
|                                                   | Mutant               | 37 (48.1)           | 7 (31.8)            |                     |
| Primary tumour resection                          | No                   | 7 (8.8)             | 0 (0.0)             | 0.336               |
|                                                   | Yes                  | 73 (91.2)           | 22 (100.0)          |                     |
| Number of intervening treatments*                 | 0-1                  | 34 (42.5)           | 14 (63.6)           | 0.129               |
|                                                   | ≥ 2                  | 46 (57.5)           | 8 (36.4)            |                     |
| Third drug concomitant to oxaliplatin retreatment | No                   | 58 (72.5)           | 15 (68.2)           | 0.896               |
|                                                   | Yes                  | 22 (27.5)           | 7 (31.8)            |                     |
| Line of oxaliplatin retreatment                   | 0-2                  | 36 (45.0)           | 12 (54.5)           | 0.580               |
|                                                   | ≥ 3                  | 44 (55.0)           | 10 (45.5)           |                     |
| Anti-EGFR concomitant to oxaliplatin retreatment  | No                   | 77 (96.2)           | 19 (86.4)           | 0.217               |
|                                                   | Yes                  | 3 (3.8)             | 3 (13.6)            |                     |
| Anti-VEGF concomitant to oxaliplatin retreatment  | No                   | 61 (76.2)           | 18 (81.8)           | 0.791               |
|                                                   | Yes                  | 19 (23.8)           | 4 (18.2)            |                     |
| PD while on first oxaliplatin-based regimen       | No                   | 72 (90.0)           | 22 (100.0)          | 0.272               |
|                                                   | Yes                  | 8 (10.0)            | 0 (0.0)             |                     |
| First oxaliplatin-based regimen setting           | Adjuvant             | 38 (47.5)           | 15 (68.2)           | 0.139               |
|                                                   | Metastatic           | 42 (52.5)           | 7 (31.8)            |                     |

**Keys:** \*= the term “treatments” includes all approaches (medical, surgical or local such as radiotherapy and others).

**Legend:** PD=progressive disease; SD=stable disease; PR=partial response; CR=complete response.

**Supplementary Table S3.** Logistic regression analysis of overall disease control rate (DCR) with oxaliplatin retreatment.

| Characteristic                                    | Variables            | PD<br>(N,%) | SD+PR+CR<br>(N,%) | Significance<br>(p) |
|---------------------------------------------------|----------------------|-------------|-------------------|---------------------|
| Oxaliplatin retreatment disease control rate      |                      | 43 (42.2)   | 59 (57.8)         | -                   |
| Primary tumour location                           | Right colon          | 11 (25.6)   | 20 (33.9)         | 0.494               |
|                                                   | Left colon or rectal | 32 (74.4)   | 39 (66.1)         |                     |
| Stage at diagnosis                                | Stage II             | 3 (7.0)     | 8 (13.6)          | 0.475               |
|                                                   | Stage III            | 19 (44.2)   | 21 (35.6)         |                     |
|                                                   | Stage IV             | 21 (48.8)   | 30 (50.8)         |                     |
| Age at initial diagnosis                          | Median (IQR)         | 54.4 (10.8) | 56.9 (11.8)       | 0.279               |
| Gender                                            | Male                 | 22 (51.2)   | 36 (61.0)         | 0.430               |
|                                                   | Female               | 21 (48.8)   | 23 (39.0)         |                     |
| KRAS status                                       | Wild-type            | 22 (55.0)   | 33 (55.9)         | 1.000               |
|                                                   | Mutant               | 18 (45.0)   | 26 (44.1)         |                     |
| Number of intervening treatments*                 | 0-1                  | 12 (27.9)   | 36 (61.0)         | 0.002               |
|                                                   | ≥ 2                  | 31 (72.1)   | 23 (39.0)         |                     |
| Third drug concomitant to oxaliplatin retreatment | No                   | 35 (81.4)   | 38 (64.4)         | 0.098               |
|                                                   | Yes                  | 8 (18.6)    | 21 (35.6)         |                     |
| Line of oxaliplatin retreatment                   | 0-2                  | 15 (34.9)   | 33 (55.9)         | 0.057               |
|                                                   | ≥ 3                  | 28 (65.1)   | 26 (44.1)         |                     |
| First oxaliplatin-based regimen setting           | Adjuvant             | 22 (51.2)   | 31 (52.5)         | 1.000               |
|                                                   | Metastatic           | 21 (48.8)   | 28 (47.5)         |                     |

**Keys:** \*= the term “treatments” includes all approaches (medical, surgical or local such as radiotherapy and others).

**Legend:** PD=progressive disease; SD=stable disease; PR=partial response; CR=complete response.

**Supplementary Table S4.** Odds ratios at univariate and multivariate analysis of metastatic colorectal cancer patients who were evaluable for disease control rate (DCR) with oxaliplatin retreatment.

| Characteristic                                    | Variables   | PD        | SD+PR+CR  | OR (univariable)          | OR (multivariable)        |
|---------------------------------------------------|-------------|-----------|-----------|---------------------------|---------------------------|
| Primary tumour location                           | Right colon | 11 (35.5) | 20 (64.5) | -                         | -                         |
|                                                   | Left colon  | 32 (45.1) | 39 (54.9) | 0.67 (0.27-1.58, p=0.368) | 0.61 (0.22-1.62, p=0.329) |
| Stage at initial diagnosis                        | Stage II    | 3 (27.3)  | 8 (72.7)  | -                         | -                         |
|                                                   | Stage III   | 19 (47.5) | 21 (52.5) | 0.41 (0.08-1.67, p=0.239) | 0.28 (0.05-1.38, p=0.135) |
|                                                   | Stage IV    | 21 (41.2) | 30 (58.8) | 0.54 (0.11-2.10, p=0.395) | 0.67 (0.12-3.15, p=0.626) |
| Gender                                            | Male        | 22 (37.9) | 36 (62.1) | -                         | -                         |
|                                                   | Female      | 21 (47.7) | 23 (52.3) | 0.67 (0.30-1.48, p=0.322) | 0.63 (0.26-1.50, p=0.302) |
| KRAS status                                       | Wild-type   | 22 (40.0) | 33 (60.0) | -                         | -                         |
|                                                   | Mutant      | 18 (40.9) | 26 (59.1) | 0.96 (0.43-2.17, p=0.927) | -                         |
| Number of intervening treatments*                 | 0-1         | 12 (25.0) | 36 (75.0) | -                         | -                         |
|                                                   | ≥ 2         | 31 (57.4) | 23 (42.6) | 0.25 (0.10-0.57, p=0.001) | 0.27 (0.10-0.66, p=0.005) |
| Third drug concomitant to oxaliplatin retreatment | No          | 35 (47.9) | 38 (52.1) | -                         | -                         |
|                                                   | Yes         | 8 (27.6)  | 21 (72.4) | 2.42 (0.98-6.46, p=0.064) | 2.04 (0.67-6.67, p=0.220) |
| Line of oxaliplatin retreatment                   | 0-2         | 15 (31.2) | 33 (68.8) | -                         | -                         |
|                                                   | ≥ 3         | 28 (51.9) | 26 (48.1) | 0.42 (0.18-0.94, p=0.037) | -                         |
| First oxaliplatin-based regimen setting           | Adjuvant    | 22 (41.5) | 31 (58.5) | -                         | -                         |
|                                                   | Metastatic  | 21 (42.9) | 28 (57.1) | 0.95 (0.43-2.08, p=0.890) | 0.75 (0.26-2.13, p=0.596) |

**Supplementary Figure S1.** Forest plot depicting the hazard ratios of the multivariate analysis of oxaliplatin retreatment disease control rate (DCR).

DCR: OR (95% CI, p-value)

|                         |              |                           |
|-------------------------|--------------|---------------------------|
| Stage                   | Stage II     | -                         |
|                         | Stage III    | 0.28 (0.05-1.38, p=0.135) |
|                         | Stage IV     | 0.67 (0.12-3.15, p=0.626) |
| Gender                  | M            | -                         |
|                         | F            | 0.63 (0.26-1.50, p=0.302) |
| Sidedness               | Right colon  | -                         |
|                         | Left colon   | 0.61 (0.22-1.62, p=0.329) |
| N_of_intervening_treat. | 0-1 IT       | -                         |
|                         | 2 or more IT | 0.27 (0.10-0.66, p=0.005) |
| Monoclonal_Ab           | No           | -                         |
|                         | Yes          | 2.04 (0.67-6.67, p=0.220) |
| Setting_1st_Oxaliplatin | Adjuvant     | -                         |
|                         | Metastatic   | 0.75 (0.26-2.13, p=0.596) |

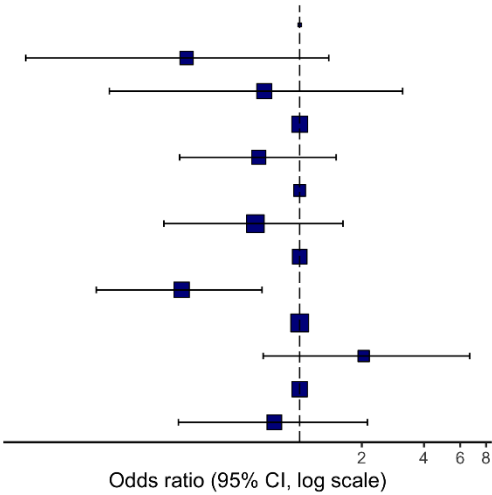

**Supplementary Figure S2.** Prevalence of standard (*RAS*, *BRAF* and *MMR*) and DNA damage response (DDR) alterations in 6 metastatic colorectal cancer (mCRC) patients who underwent next generation sequencing (NGS).

| Patient | Time/R | Standard molecular features |      |      |     | DDR genes (NGS) |     |       |       |       |       |
|---------|--------|-----------------------------|------|------|-----|-----------------|-----|-------|-------|-------|-------|
|         |        | KRAS                        | NRAS | BRAF | MMR | BRIP1           | ATR | PALB2 | FANCA | CHEK2 | RAD21 |
| 1       | A      |                             |      |      |     |                 |     |       |       |       |       |
| 2       | B      |                             |      |      |     |                 |     |       |       |       |       |
| 3       | B      |                             |      |      |     |                 |     |       |       |       |       |
| 4       | A      |                             |      |      |     |                 |     |       |       |       |       |
| 5       | A      |                             |      |      |     |                 |     |       |       |       |       |
| 6       | B      |                             |      |      |     |                 |     |       |       |       |       |

Response:

PR

SD

Legend: Timing=timing of tumor tissue sampling compared to oxaliplatin retreatment. R=response; A=after oxaliplatin retreatment; B=before oxaliplatin retreatment; Blue dot=mutant; Violet dot=amplified. List of DNA damage response (DDR) genes included in the panel of Foundation Medicine Assay next generation sequencing (NGS): ARID1A, ATM, ATR, ATRX, BAP1, BARD1, BRCA1, BRCA2, BRIP1, CHEK1, CHEK2, FANCA, FANCA, FANCG, FANCL, PALB2, PARP1, PARP2, PARP3, PPARG, PPP2R1A, PPP2R2A, RAD21, RAD51, RAD51B, RAD51C, RAD51D, RAD52, RAD54L, TIPARP, XRCC2
